# Supplementary material for: N-phosphonacetyl-L-aspartate enhances type I interferon anti-viral responses through activation of non-canonical NOD2 signaling
Source: bioRxiv or medRxiv preprint supplement (doi:10.1101/2022.02.08.479597), 2022-02-08
Supplement: Supplementary file [file media-1.pdf]

## Supplemental Information Appendix

N-phosphonacetyl-L-aspartate enhances type I interferon anti-viral responses through activation of non-canonical NOD2 signaling

Andr s K. Ponti<sup>a</sup>, Megan T. Zangara<sup>a,b</sup>, Christine M. O'Connor<sup>b,c</sup>, Erin E. Johnson<sup>a,d</sup>, and Christine McDonald<sup>a,b\*</sup>

<sup>a</sup>Department of Inflammation and Immunity, Lerner Research Institute, Cleveland Clinic, Cleveland, Ohio, 44195

<sup>b</sup>Department of Molecular Medicine, Cleveland Clinic Lerner College of Medicine at Case Western Reserve University, Cleveland, Ohio, 44106

<sup>c</sup>Department of Genomic Medicine, Infection Biology Program, Lerner Research Institute, Cleveland Clinic, Cleveland, Ohio, 44195

<sup>d</sup>Department of Biology, John Carroll University, University Heights, Ohio, 44118

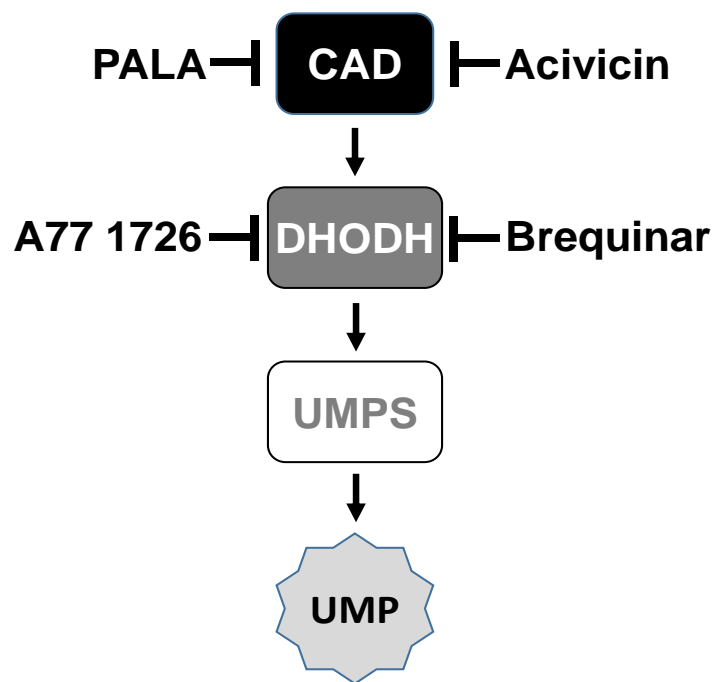

**Figure S1: Illustration of the targets of the *de novo* pyrimidine synthesis inhibitors used in this study.** *N*-phosphonacetyl-L-aspartate (PALA); carbamoyl-phosphate synthetase 2/ aspartate transcarbamylase/ dihydroorotase (CAD); dihydroorotate dehydrogenase (DHODH); uridine monophosphate synthase (UMPS); uridine monophosphate (UMP)

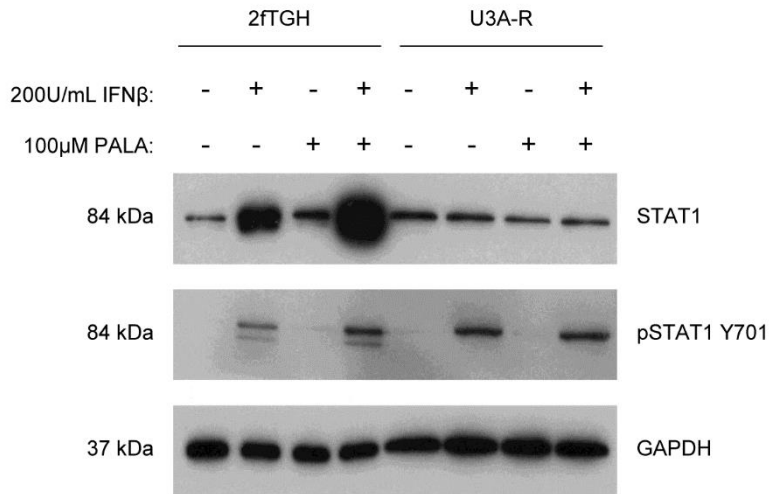

**Figure S2: Enhancement of IFN $\beta$ -stimulated STAT1 protein expression by PALA requires the STAT1 promoter.** Immunoblot analysis of STAT1 protein levels in lysates from either cells with endogenous STAT1 expression (2fTGH cells) or a mutant of this cell line that lacks endogenous STAT1 expression but has STAT1 stably expressed from a CMV promoter (U3A-R). Cells were treated for 24h with either IFN $\beta$ , PALA, or a combination of IFN $\beta$  and PALA. Representative of 3 independent experiments.
